# Supplementary material for: Genome-wide association studies of Long COVID and post-acute complications of SARS-CoV-2 in the UK Biobank Data
Source: Research Square preprint supplement (doi:10.21203/rs.3.rs-7676837/v1), 2025-09-26

# Supplementary Material

**Supplementary Note 1.** Definition of pre-existing symptoms attributable to other diseases rather than COVID-19.

The Health and well-being online questionnaireassessed the length of each symptom by asking people for how long they have been suffering the a specific symptom. The answer could be either (1) less than two weeks, (2) two to four weeks, (3) four to twelve weeks, (4) more than twelve weeks, (5) do not know, or (6) prefer not to answer. If participants reported options (1), (2), (5), (6), we assumed that the patient did not have pre-existing symptoms. If participants reported option (3) we assumed that the symptoms started four weeks before answering the questionnaire (28 days). If participants reported option (4), we directly assumed that the participants had pre-existing symptoms, as the date when the symptoms started could not be determined. Afterwards, we excluded those participants who reported option (4) or those whose date of answering the questionnaire minus the number of days they have been suffering the symptoms was before the date of the infection.

For those WHO symptoms that were mapped to more than one UK Biobank symptom, the duration was determined by the symptom with longest duration.

**Supplementary Note 2.** Long COVID subtype cohort differences with the discovery cohort

Participants who did not answer symptom-related questions were not excluded. Additionally, the length of the subtype symptom was determined by the symptom with shortest duration.

**Supplementary Table 1.** UK Biobank symptoms mapped to the World Health Organisation (WHO) Delphi consensus.

| **WHO symptom** | **UK Biobank symptom** |
| --- | --- |
| Abdominal pain | Abdominal pain / tummy ache |
| Menstrual and period problems | - |
| Altered smell/taste | Loss or change in sense of smell  Loss or change in sense of taste |
| Anxiety | Problems relating to mood anxiety and emotions |
| Blurred vision | Vision problems |
| Chest pain | Chest pain  Pain on breathing |
| Cognitive dysfunction / brain fog | Problems communicating  Problems thinking |
| Cough | Persistent cough |
| Depression | - |
| Dizziness | Dizziness / light headedness |
| Fatigue | Mild fatigue  Severe fatigue |
| Intermitted fever | Fever |
| Gastrointestinal issues | Gastrointestinal issues |
| Headache | Headache |
| Memory issues | - |
| Joint pain | Joint pain or swelling of joint |
| Muscle pain / spasms | Muscle pain / achy muscles |
| Neuralgias | - |
| New onset allergies | New allergy or intolerance |
| Pins and needles sensations | Numbness or tigling somewhere in the body |
| Post-exertional malaise | Post-exertional symptom exacerbation |
| Shortness of breath | Shortness of breath or trouble breathing |
| Sleep disorders | Difficulty sleeping  Unrestful sleep |
| Tachycardia / palpitations | Postural tachycardia |
| Tinnitus and other hearing issues | Tinnitus  Hearing loss  Hearing issues |

**Supplementary Table 2.** Post-acute COVID-19 sequelae (PACS-CVD) diagnoses used to phenotype the condition

| **Organ system** | **Sequela** | **ICD10 code** |
| --- | --- | --- |
| Cardiovascular | Acute coronary disease | I24, I240, I241, I248, I249 |
| Cardiovascular | Angina | I20, I200, I201, I208, I209 |
| Cardiovascular | Atrial fibrillation | I480, I481, I482 |
| Cardiovascular | Atrial flutter | I483, I484 |
| Cardiovascular | Bradycardia | R001 |
| Cardiovascular | Cardiac arrest | I46, I460, I461, I469 |
| Cardiovascular | Cariogenic shock | R570 |
| Cardiovascular | Heart failure | I50, I500, I501, I509 |
| Cardiovascular | Ischemic cardiomyopathy | I255 |
| Cardiovascular | Myocardial infarction | I21, I210, I211, I212, I213, I214, I219  I21X, I22, I220, I221, I228, I229 |
| Cardiovascular | Myocarditis | I514 |
| Cardiovascular | Non ischemic cardiomyopathy | I42, I420, I421, I422, I423, I424, I425, I426, I427, I428, I429, I43, I430, I431, I432, I438 B332 |
| Cardiovascular | Pericarditis | I30, I300, I301, I308, I309, I311, I312, I313, I318, I319, I32, I320, I321, I328 |
| Cardiovascular | Tachycardia | R000 |
| Cardiovascular | Ventricular arrhythmias | I490, I470, I471, I472 |
| Coagulation | Anaemia | D60, D600, D601, D608, D609, D61, D610, D611, D612, D613, D618, D619, D63, D630, D631, D638, D64, D640, D641, D642, D643, D644, D648, D649 |
| Coagulation | Coagulation defect | D689 |
| Coagulation | Deep vein thrombosis | I801, I802, I803, I81, I81X |
| Coagulation | Pulmonary embolism | I26, I260, I269 |
| Coagulation | Venous thrombotic embolism | I82, I820, I822, I823, I828, I829 |

| **Chromosome** | **Base pair start** | **Base pair end** |
| --- | --- | --- |
| 1 | 48227412 | 52227412 |
| 2 | 86146488 | 101133568 |
| 2 | 89563673 | 89564169 |
| 2 | 98080299 | 98080324 |
| 2 | 183291754 | 190291755 |
| 3 | 47524995 | 50024996 |
| 3 | 83417309 | 86917310 |
| 5 | 44464242 | 50464243 |
| 5 | 128972100 | 131972101 |
| 6 | 25392020 | 33392022 |
| 6 | 56892040 | 63942041 |
| 6 | 139958306 | 142458307 |
| 7 | 55032505 | 66362565 |
| 8 | 7962589 | 11962591 |
| 8 | 42880842 | 49837447 |
| 8 | 111930823 | 114930824 |
| 10 | 36959993 | 43679994 |
| 11 | 87860351 | 90860352 |
| 12 | 33108732 | 41713733 |
| 20 | 32536338 | 35066586 |

**Supplementary Table 3.** Regions with extended linkage disequilibrium excluded from the analysis.

**Supplementary Table 4.** Long COVID, respiratory and chest symptoms results. Note: CHR = Chromosome; BP = Base Pair; SNP = Single Nucleotide Polymorphism; EA = Effect Allele; OA = Other allele; EAF = Effect Allele Frequency; OR = Odds Ratio; SE = Standard Error.

| **CHR** | **BP** | **SNP** | **EA** | **OA** | **EAF** | **OR** | **SE** | ***P-*Value** | **Function** | **Gene** |
| --- | --- | --- | --- | --- | --- | --- | --- | --- | --- | --- |
| 4 | 74,611,451 | rs188246983 | C | T | 0.03 | 0.27 | 0.28 | 4.2e-06 | intergenic | IL8 - RP11-447E20.1 |
| 4 | 77,176,524 | rs7655112 | C | T | 0.63 | 1.40 | 0.07 | 2.4e-06 | intronic | FAM47E-STBD1 - FAM47E - FAM47E-STBD1 |
| 5 | 56,329,225 | rs78735734 | T | C | 0.06 | 1.79 | 0.12 | 1.2e-06 | intergenic | AC114973.1 - RP11-101B14.4 |
| 5 | 177,603,653 | rs28806942 | T | C | 0.04 | 2.02 | 0.14 | 1.1e-06 | intergenic | RP11-889L3.4 - GMCL1P1 |
| 8 | 35,055,872 | rs62503875 | A | G | 0.01 | 2.75 | 0.22 | 4.2e-06 | intergenic | AC098612.1 - UNC5D |
| 10 | 123,882,450 | rs11200414 | G | A | 0.80 | 1.55 | 0.09 | 9.6e-07 | intronic | TACC2 |
| 14 | 22,443,483 | rs79276774 | T | G | 0.21 | 0.66 | 0.09 | 4.0e-06 | intergenic | TRAV12-3 - TRAV8-6 |
| 14 | 41,935,005 | rs116950676 | A | G | 0.02 | 2.61 | 0.21 | 3.6e-06 | intergenic | AL390335.1 - CTD-2298J14.1 |
| 19 | 5,693,616 | rs35804229 | T | C | 0.02 | 2.45 | 0.19 | 3.4e-06 | exonic | LONP1 |
| 20 | 13,163,234 | rs7273138 | G | A | 0.34 | 1.38 | 0.07 | 2.0e-06 | intergenic | SPTLC3 - ISM1 |

**Supplementary Table 5.** Long COVID, ENT symptoms subtype results. Note: CHR = Chromosome; BP = Base Pair; SNP = Single Nucleotide Polymorphism; EA = Effect Allele; OA = Other allele; EAF = Effect Allele Frequency; OR = Odds Ratio; SE = Standard Error.

| **CHR** | **BP** | **SNP** | **EA** | **OA** | **EAF** | **OR** | **SE** | **PVAL** | **Function** | **Gene** |
| --- | --- | --- | --- | --- | --- | --- | --- | --- | --- | --- |
| 4 | 113,686,340 | rs116512169 | T | C | 0.03 | 2.06 | 0.15 | 1.2e-06 | intergenic | Y_RNA - RPL7AP30 |
| 5 | 108,310,017 | rs13358819 | G | A | 0.04 | 0.40 | 0.18 | 3.3e-07 | intronic | FER |
| 6 | 15,702,683 | rs4623247 | G | A | 0.11 | 1.49 | 0.09 | 4.8e-06 | intergenic | DTNBP1 - ARPC3P5 |
| 6 | 104,084,384 | rs9377551 | A | G | 0.58 | 0.76 | 0.06 | 1.8e-06 | intergenic | SNORA33 - R3HDM2P2 |
| 8 | 9,992,235 | rs73530926 | G | C | 0.02 | 2.40 | 0.19 | 4.0e-06 | intronic | MSRA |
| 9 | 81,420,360 | rs139094115 | T | G | 0.02 | 2.36 | 0.18 | 1.3e-06 | intergenic | MTND2P8 - KRT18P24 |
| 10 | 32,303,249 | rs74333406 | A | G | 0.21 | 1.38 | 0.07 | 3.5e-06 | intronic | KIF5B |
| 11 | 128,974,045 | rs7118778 | G | C | 0.09 | 0.58 | 0.12 | 3.1e-06 | intronic | ARHGAP32 |
| 12 | 2,751,121 | rs75808668 | A | C | 0.03 | 2.05 | 0.15 | 2.6e-06 | intronic | CACNA1C |
| 14 | 62,068,188 | rs55668906 | T | C | 0.10 | 1.51 | 0.09 | 5.0e-06 | intronic | RP11-47I22.3 - RP11-47I22.4 |
| 14 | 80,934,122 | rs11159463 | G | A | 0.90 | 1.69 | 0.11 | 2.5e-06 | intergenic | DIO2-AS1 - CEP128 |
| 16 | 25,646,165 | rs79824211 | T | A | 0.04 | 1.89 | 0.13 | 1.4e-06 | intergenic | CYCSP39 - HS3ST4 |

**Supplementary Table 6.** Long COVID, neurological symptoms subtype results. Note: CHR = Chromosome; BP = Base Pair; SNP = Single Nucleotide Polymorphism; EA = Effect Allele; OA = Other allele; EAF = Effect Allele Frequency; OR = Odds Ratio; SE = Standard Error.

| **CHR** | **BP** | **SNP** | **EA** | **OA** | **EAF** | **OR** | **SE** | **PVAL** | **Function** | **Gene** |
| --- | --- | --- | --- | --- | --- | --- | --- | --- | --- | --- |
| 1 | 81,681,594 | rs6699229 | C | T | 0.51 | 0.80 | 0.05 | 7.2e-07 | intergenic | RP3-445O10.1 - RN7SKP247 |
| 2 | 12,139,015 | rs147149354 | G | C | 0.01 | 0.19 | 0.36 | 3.3e-06 | ncRNA_intronic | AC096559.1 |
| 5 | 117,125,098 | rs115868163 | G | A | 0.01 | 2.17 | 0.16 | 1.6e-06 | intergenic | RPL7L1P4 - CTD-3179P9.1 |
| 7 | 23,754,383 | rs78009084 | A | G | 0.02 | 0.42 | 0.19 | 4.6e-06 | intronic | STK31 |
| 9 | 2,570,796 | rs75958613 | G | A | 0.01 | 2.17 | 0.16 | 9.2e-07 | ncRNA_intronic | RP11-125B21.2 |
| 17 | 8,851,379 | rs12943587 | G | A | 0.01 | 2.42 | 0.18 | 7.0e-07 | intronic | PIK3R5 |
| 17 | 79,147,409 | rs117076160 | T | C | 0.02 | 0.37 | 0.21 | 2.8e-06 | ncRNA_intronic | AATK-AS1 |
| 18 | 21,845,650 | rs117614877 | T | C | 0.01 | 2.15 | 0.15 | 5.6e-07 | intronic | OSBPL1A |
| 19 | 3,274,527 | rs79049673 | T | C | 0.02 | 2.04 | 0.15 | 1.2e-06 | intronic | CELF5 |
| 19 | 9,019,605 | rs12981679 | G | C | 0.76 | 0.79 | 0.05 | 4.2e-06 | exonic | MUC16 |

**Supplementary Table 7.** Long COVID, fatigue symptoms subtype results. Note: CHR = Chromosome; BP = Base Pair; SNP = Single Nucleotide Polymorphism; EA = Effect Allele; OA = Other allele; EAF = Effect Allele Frequency; OR = Odds Ratio; SE = Standard Error.

| **CHR** | **BP** | **SNP** | **EA** | **OA** | **EAF** | **OR** | **SE** | **PVAL** | **Function** | **Gene** |
| --- | --- | --- | --- | --- | --- | --- | --- | --- | --- | --- |
| 6 | 92,548,874 | rs2501653 | G | T | 0.17 | 1.19 | 0.04 | 3.5e-06 | intergenic | RP11-40G16.1 - RPL5P19 |
| 7 | 39,433,817 | rs79409011 | C | G | 0.07 | 0.76 | 0.06 | 4.6e-06 | intronic | POU6F2 |
| 10 | 114,839,337 | rs113267365 | A | T | 0.01 | 1.76 | 0.12 | 2.1e-06 | intronic | TCF7L2 |
| 10 | 121,167,278 | rs79290746 | A | G | 0.01 | 0.50 | 0.15 | 4.6e-06 | intronic | GRK5 |
| 11 | 25,734,129 | rs112660897 | C | T | 0.03 | 0.58 | 0.10 | 2.9e-07 | intergenic | RP11-46P12.1 - RP11-405K6.1 |
| 11 | 125,921,356 | rs112343863 | C | T | 0.02 | 0.57 | 0.12 | 4.1e-06 | intronic | CDON |
| 12 | 54,126,061 | rs17102257 | C | T | 0.01 | 1.67 | 0.11 | 2.1e-06 | intergenic | CALCOCO1 - RP11-686F15.3 |
| 14 | 73,425,315 | rs7144193 | T | C | 0.19 | 0.84 | 0.04 | 4.3e-06 | intronic | DCAF4 |
| 15 | 84,092,255 | rs117581501 | A | G | 0.01 | 1.85 | 0.13 | 1.3e-06 | ncRNA_intronic | RP11-382A20.4 |
| 17 | 32,497,214 | rs17784068 | C | T | 0.06 | 1.33 | 0.06 | 1.9e-06 | ncRNA_intronic | RP11-215E13.1 |
| 19 | 11,037,104 | rs142129027 | A | G | 0.03 | 1.45 | 0.08 | 1.0e-06 | intronic | YIPF2 |

**Supplementary Figure 1.** Long COVID discovery cohort attrition


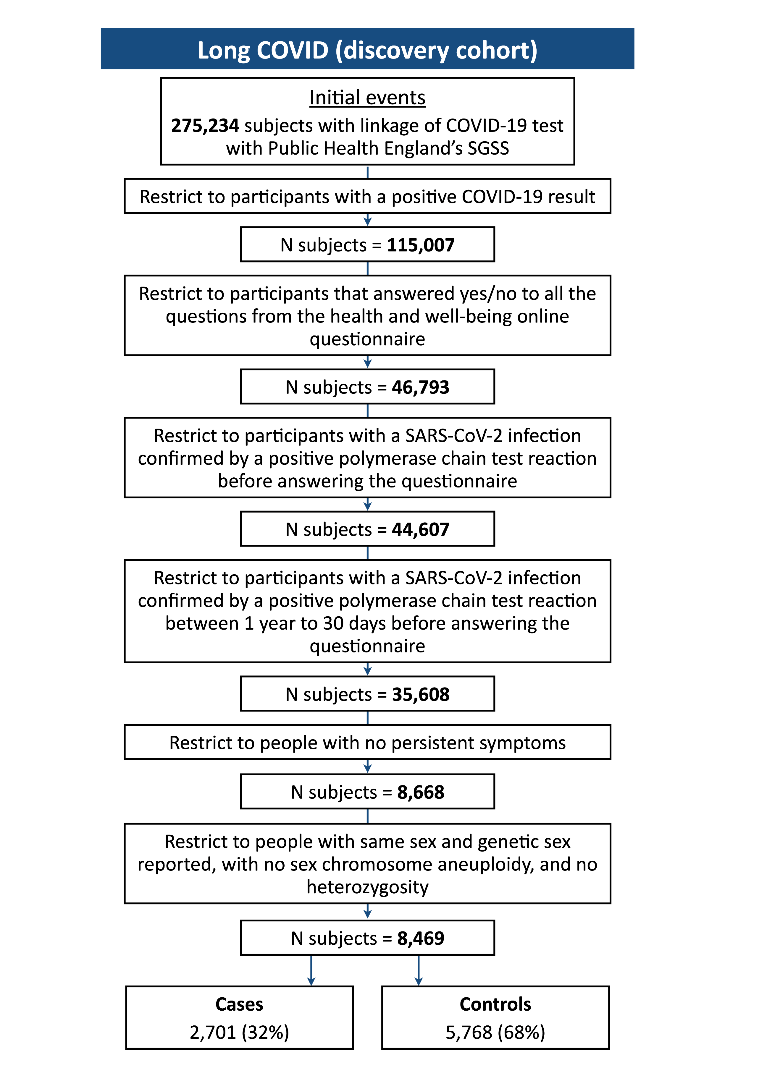


**Supplementary Figure 2.** PACS-CVD cohort attrition


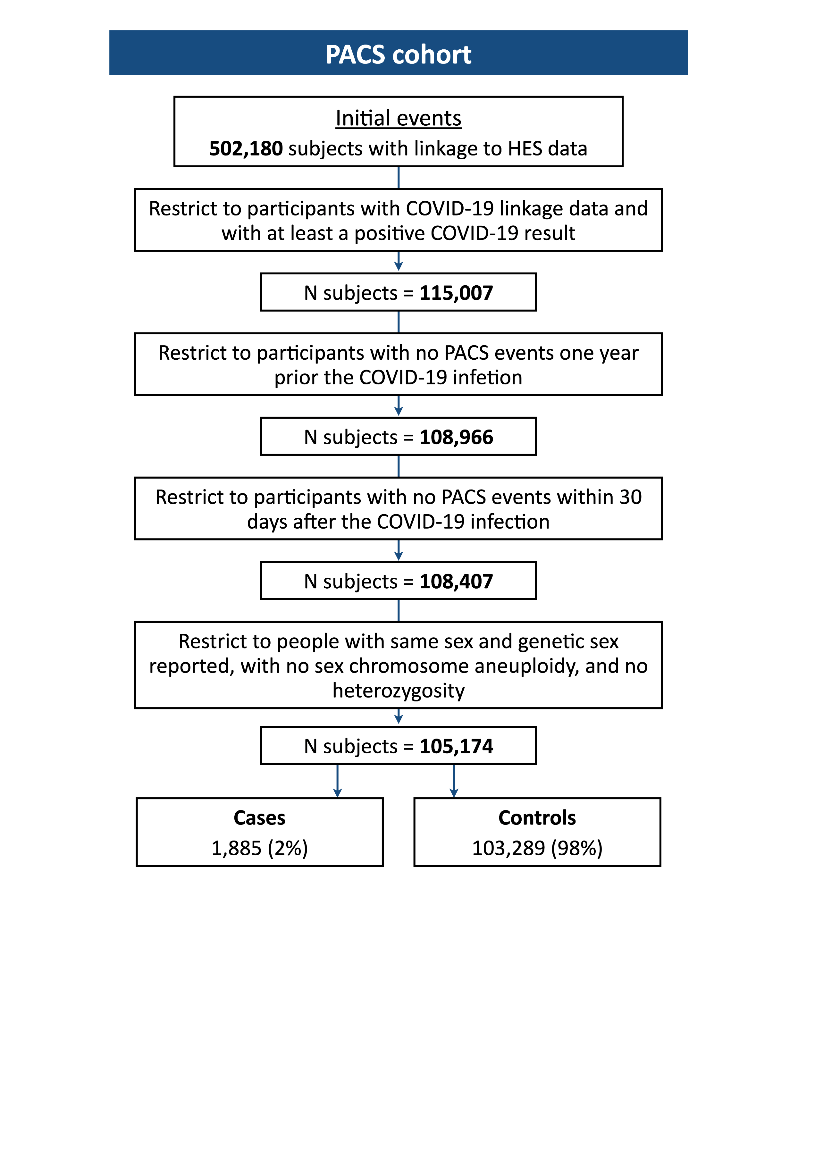


**Supplementary Figure 3.** Long COVID subtypes GWAS findings. Manhattan plots for (A) respiratory and chest symptoms subtype.


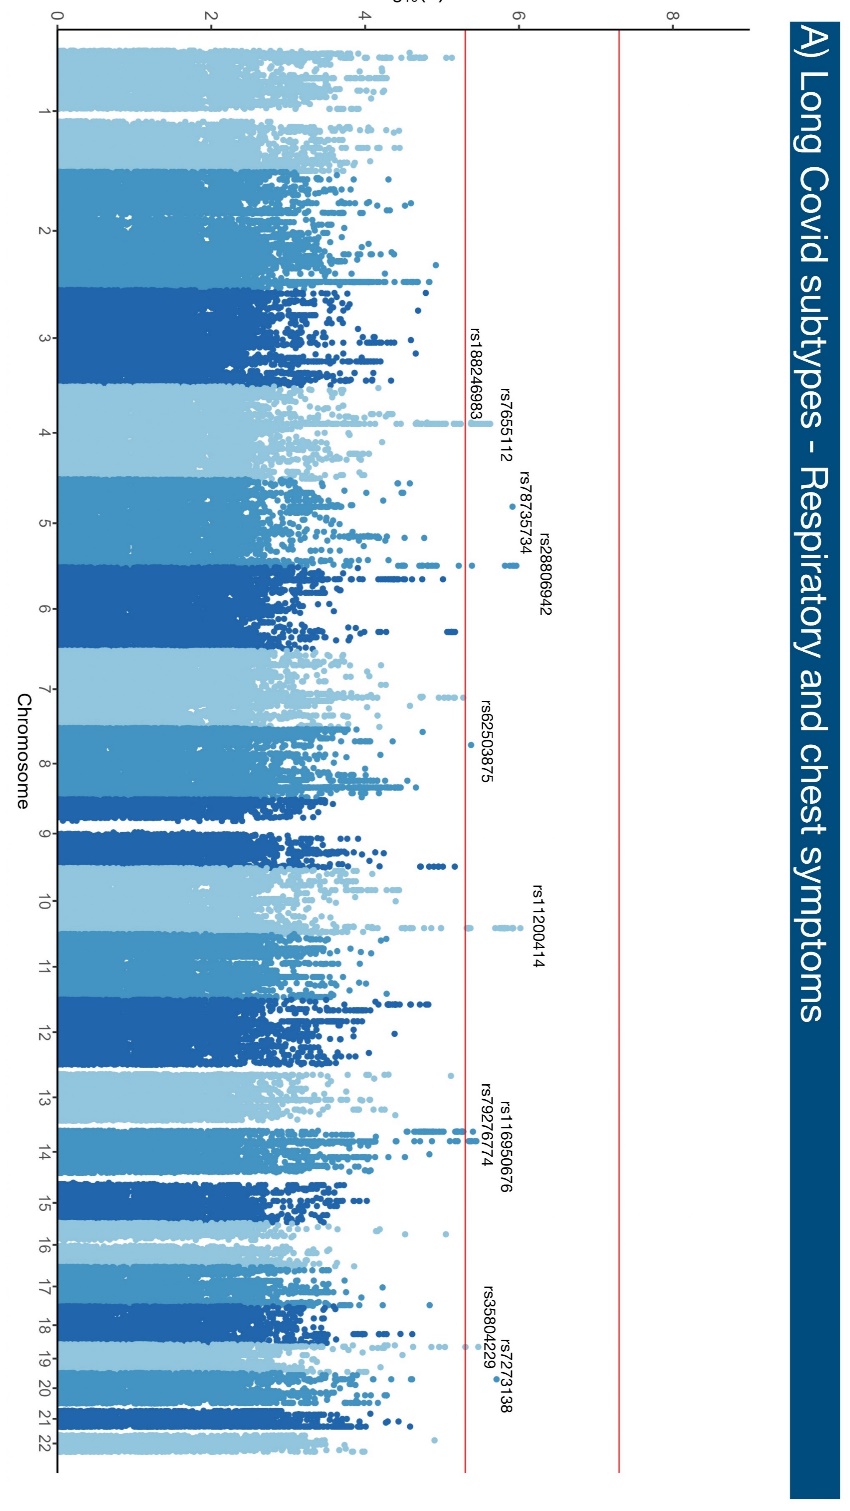


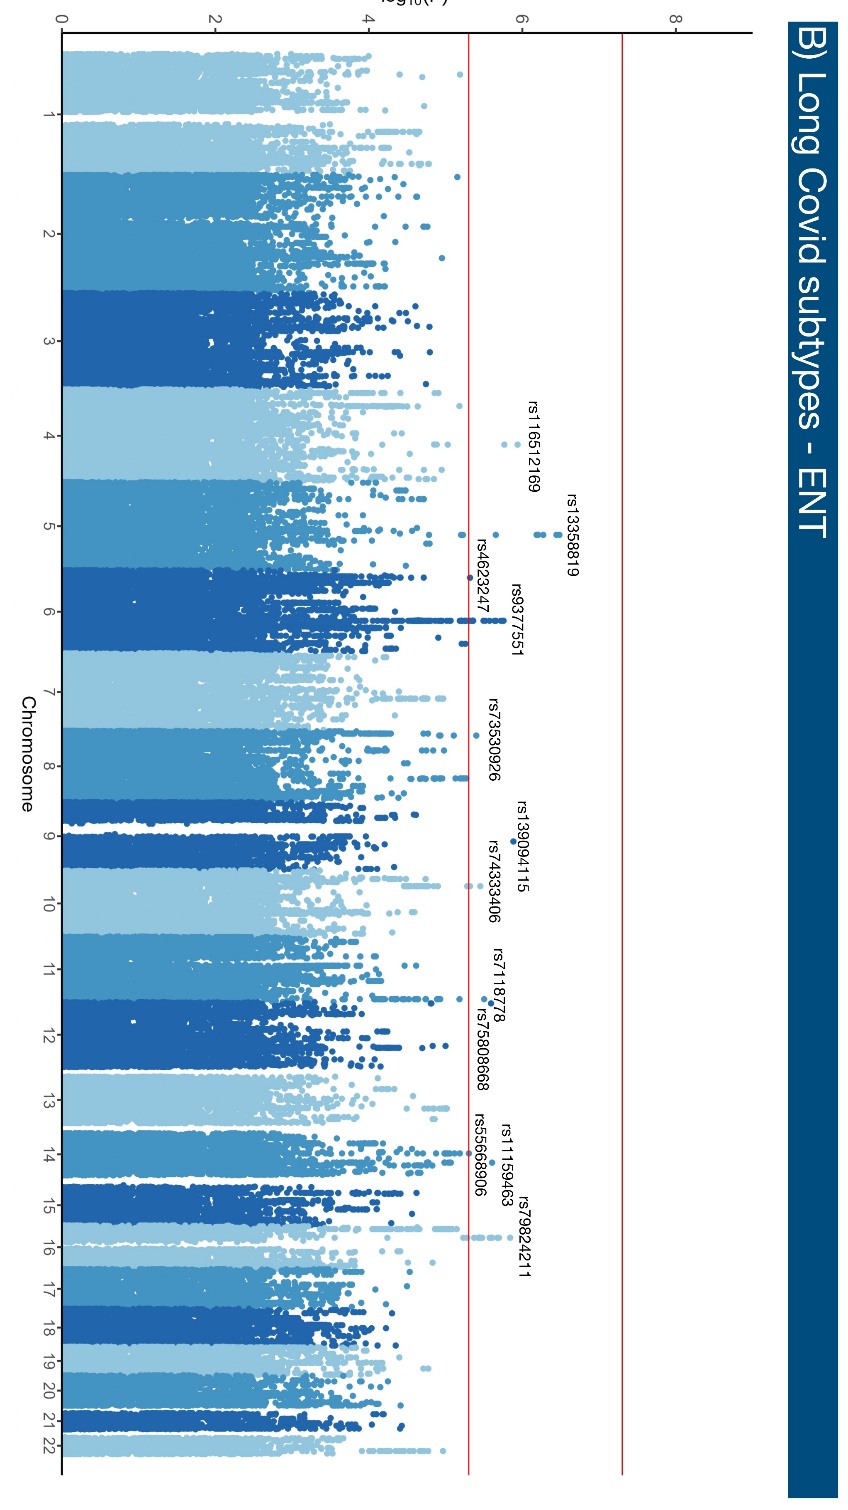


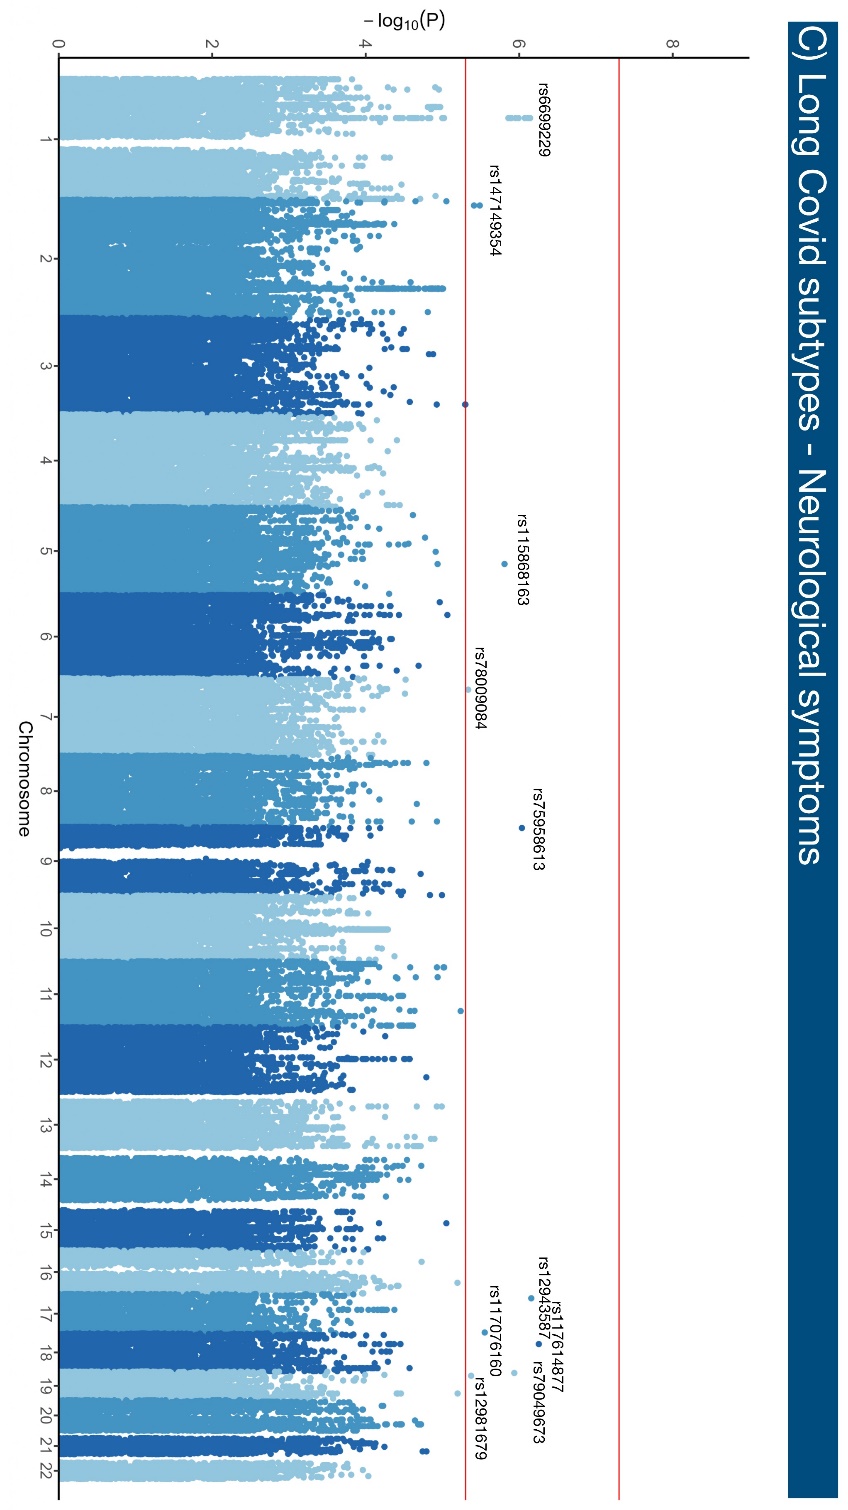


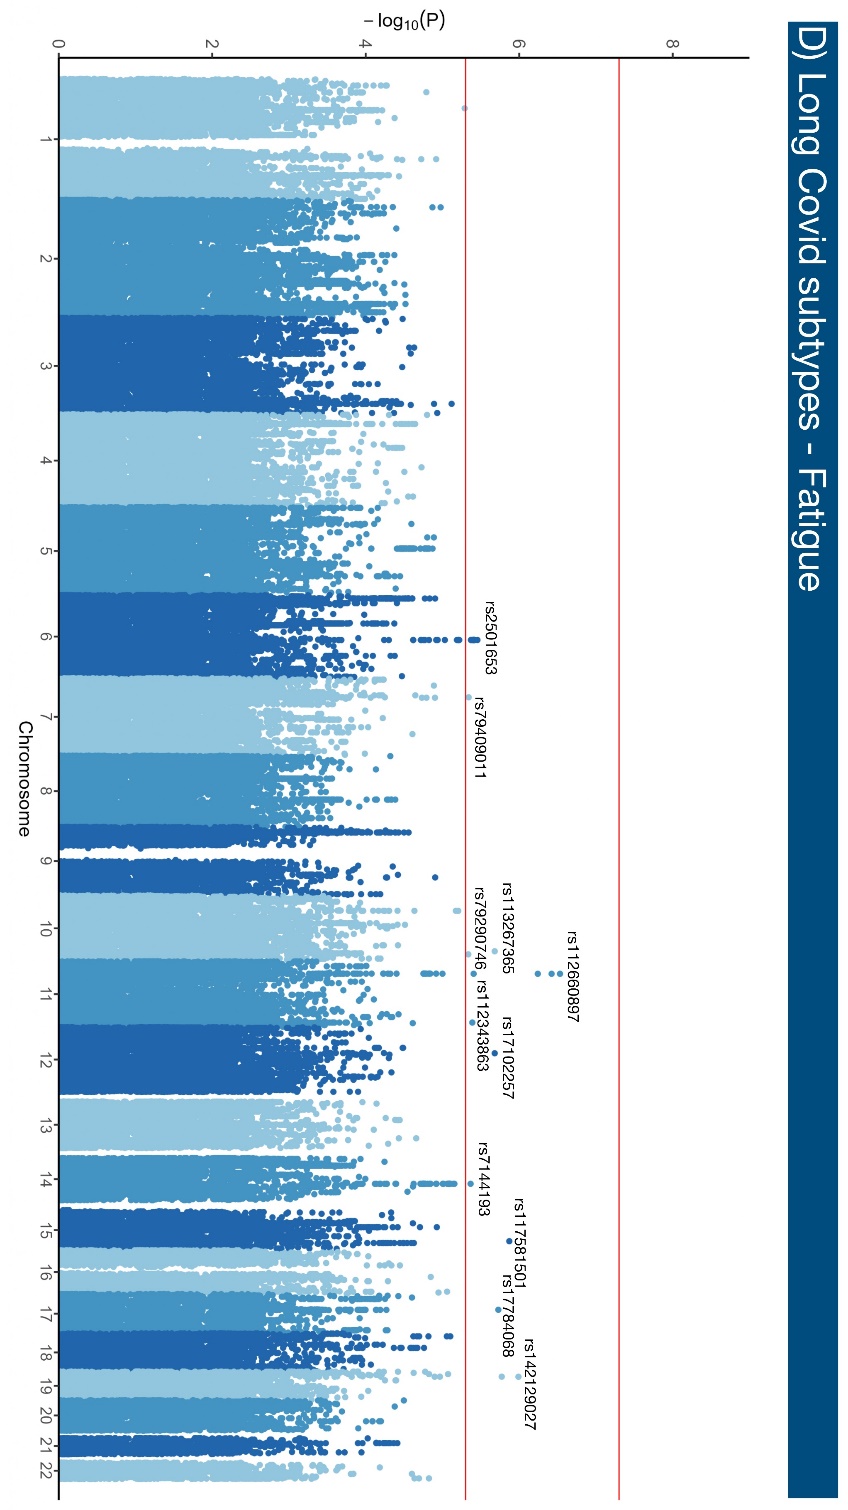


**Supplementary Figure 4.** Study design graphic.


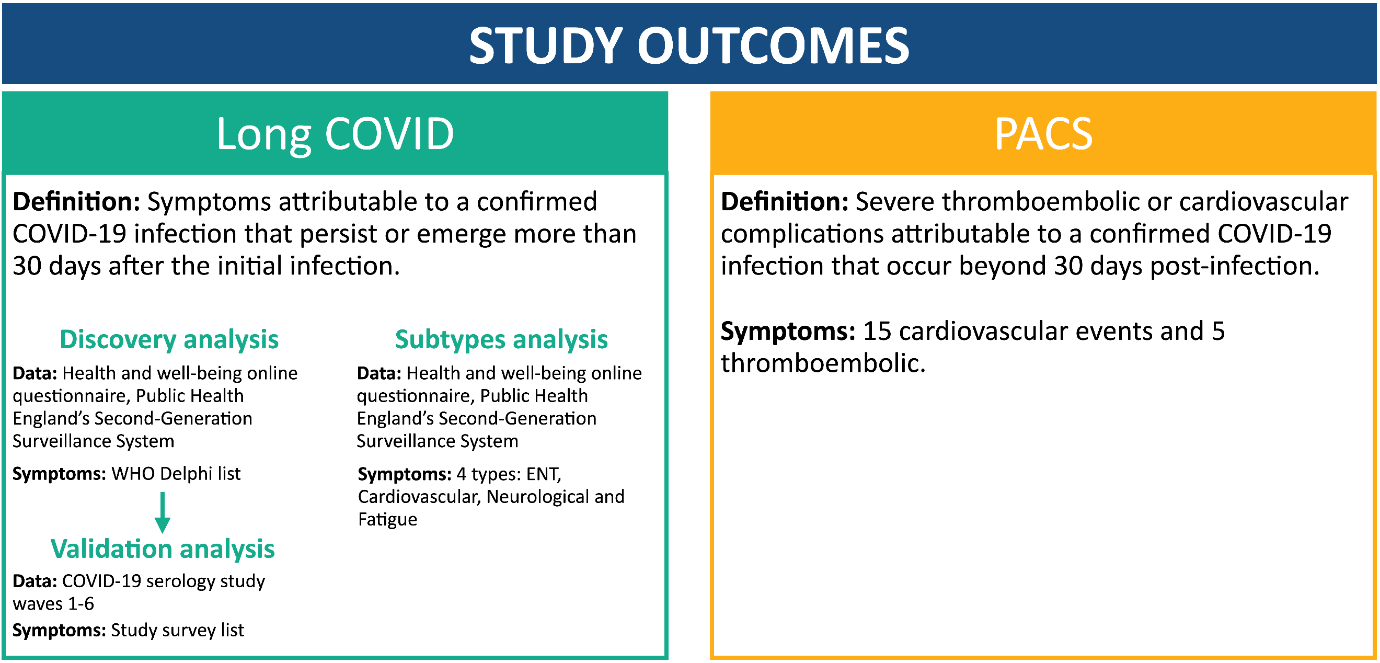

Supplement: Supplementary file 1 [file 77abebc9f5ba5a70d8993262.docx]
